# Supplementary material
Source: Springer Nature journal article supplement (https://www.springermedizin.de/resource/supplementary/12968_2013_3357_MOESM2_ESM.pdf/9583488)

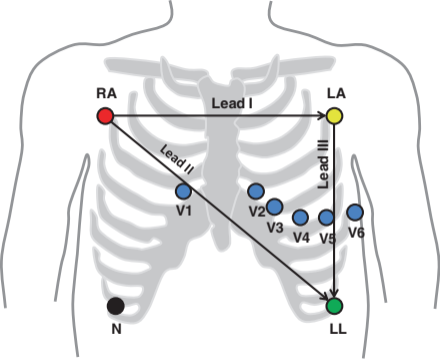

(a)

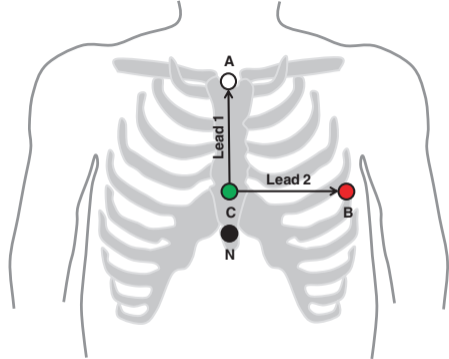

(b)

Supplement: MOESM2 [file 9583488]
